# Supplementary material
Source: publisher figshare collection journal article supplement (https://geolsoc.figshare.com/ndownloader/files/5423312)
Supplement: Supplementary file 1 [file 5423312]

Supplementary Table 1. Modal composition (%) for the Late Permian-Early Triassic medium to fine grained sandstone samples of Youjiang Basin
Samples	Qm	Qp	P	K	Lsms	Lsc	Lvl	Lvm	Lvf	Lvv	Ls	Lm	Lv	Q	F	L	Others
Hds5	5.76	0.00	13.61	9.42	1.57	0.00	47.12	12.04	0.00	9.42	1.57	0.00	68.59	5.76	23.04	70.16	1.00
Nh10	1.04	0.00	7.29	2.78	3.82	14.93	37.85	23.26	0.35	8.68	18.75	0.00	70.14	1.04	10.07	88.89	0.00
Nh9	5.43	0.00	0.90	3.62	6.33	4.07	37.10	29.41	1.81	11.31	10.41	0.00	79.64	5.43	4.52	90.05	0.00
Nh3	9.47	0.30	4.73	2.66	5.92	5.62	24.26	37.87	1.48	7.10	11.54	0.00	70.71	9.76	7.40	82.25	0.60
S12-2	19.35	0.72	5.02	7.17	0.00	0.00	23.66	17.56	5.73	16.13	0.00	0.00	63.08	20.07	12.19	63.08	4.64
S01-2	6.50	0.00	4.02	3.72	0.31	0.00	41.18	25.08	4.64	13.31	0.31	0.00	84.21	6.50	7.74	84.52	1.23
S02-2	15.12	0.00	4.32	8.02	0.93	6.79	31.48	16.05	6.17	6.79	7.72	0.00	60.49	15.12	12.35	68.21	4.31
Pnt68	2.67	2.14	18.72	12.30	4.81	10.16	32.09	10.70	1.60	4.28	14.97	0.00	48.66	4.81	31.02	63.64	0.50
Sds31	10.93	0.40	8.10	11.74	4.86	5.26	24.70	21.46	6.07	5.67	10.12	0.00	57.89	11.34	19.84	68.02	0.80
Sds42	9.68	0.65	10.32	14.19	3.23	5.48	27.10	15.48	6.13	6.77	8.71	0.00	55.48	10.32	24.52	64.19	1.00
Sds43	11.04	0.61	6.13	9.20	0.61	6.75	28.22	22.70	7.98	4.91	7.36	0.00	63.80	11.66	15.34	71.17	1.81
Sds44	21.19	0.85	8.47	13.56	2.54	0.00	31.36	6.78	4.24	10.17	2.54	0.00	52.54	22.03	22.03	55.08	0.80
Sds49	6.85	2.74	20.55	12.79	3.20	8.68	8.68	12.33	10.96	10.50	11.87	0.00	42.47	9.59	33.33	54.34	2.70
S07-2	45.27	6.08	4.05	6.08	8.78	12.16	0.00	0.00	0.68	2.03	20.95	8.11	2.70	51.35	10.14	31.76	6.80
Abbreviations: Qm, monocrystalline quartz; Qp, multicrystalline quartz; P, plagioclase; K, potassium-feldspar; Lsms, mudstone and siltstone fragment; Lsc, carbonate fragment; Lvl, lathwork volcanic lithic fragment; Lvm, microlitic volcanic lithic fragment; Lvf, felsitic volcanic lithic fragment; Lvv, vitric volcanic lithic fragment; Ls=Lsms+Lsc, total sedimentary lithic fragment; Lm, metamorphic …
